# Supplementary material for: FFAR1 activation attenuates histamine-induced myosin light chain phosphorylation and cortical tension development in human airway smooth muscle cells
Source: PubMed Central journal article supplement (PMC7708129; doi:10.1186/s12931-020-01584-w), 2020-11-30

**A**

| Donors | C <sub>T</sub> Values |             |
|--------|-----------------------|-------------|
|        | GPR40                 | Cyclophilin |
| D1     | 34.025                | 24.435      |
| D2     | 32.25                 | 22.815      |
| D3     | 34.21                 | 23.04       |
| D4     | 31.265                | 18.88       |
| D5     | 29.6                  | 18.35       |

**B**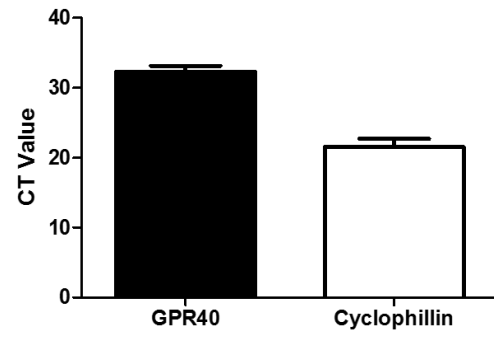

Supplement: 12931_2020_1584_MOESM2_ESM.pdf [file 12931_2020_1584_MOESM2_ESM.pdf]
