# Supplementary material for: FFAR1 activation attenuates histamine-induced myosin light chain phosphorylation and cortical tension development in human airway smooth muscle cells
Source: Springer Nature journal article supplement (doi:10.1186/s12931-020-01584-w), 2020-11-30

**A**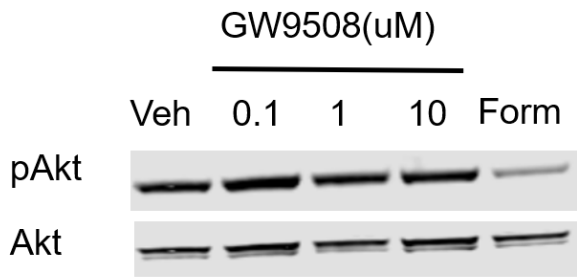**B**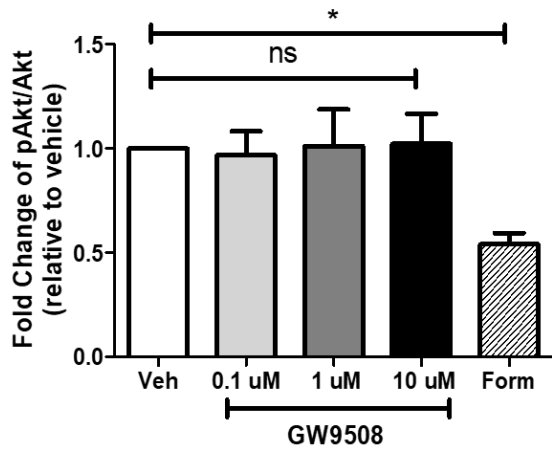**C**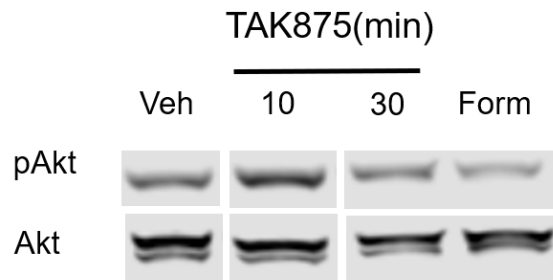**D**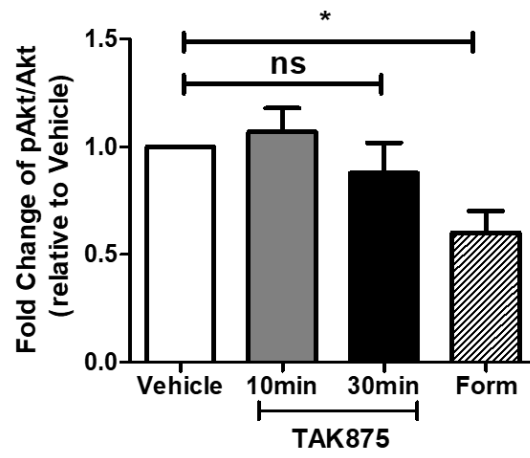

Supplement: MOESM3 [file 18641956]
